1 **Phosphorylation on PstP regulates cell wall metabolism and antibiotic**  
2 **tolerance in *Mycobacterium smegmatis***

3

4 Farah Shamma<sup>1</sup>, Kadamba Papavinasasundaram<sup>2</sup>, Samantha Y. Quintanilla<sup>1</sup>,  
5 Aditya Bandekar<sup>2</sup>, Christopher Sasseti<sup>2</sup>, and Cara C. Boutte<sup>1\*</sup>

6

7 <sup>1</sup>Department of Biology, University of Texas Arlington, Arlington, Texas

8 <sup>2</sup>Department of Microbiology and Physiological Systems, University of  
9 Massachusetts Medical School, Worcester, Massachusetts

10 \*corresponding author: [cara.boutte@uta.edu](mailto:cara.boutte@uta.edu)

11

12 Running title: Phosphorylation of PstP affects the cell wall

13

14 Key words:

15 PstP, Serine/Threonine Phosphatase, peptidoglycan metabolism, mycolic acid  
16 metabolism, antibiotic tolerance, Mycobacteria, dephosphorylation, starvation,  
17 cell wall metabolism, CwIM

18

19

20

21

22

23

24 **Abstract**

25

26 *Mycobacterium tuberculosis* and its relatives, like many bacteria, have dynamic  
27 cell walls that respond to environmental stresses. Modulation of cell wall  
28 metabolism in stress is thought to be responsible for decreased permeability and  
29 increased tolerance to antibiotics. The signaling systems that control cell wall  
30 metabolism under stress, however, are poorly understood. Here, we examine the  
31 cell wall regulatory function of a key cell wall regulator, the Serine Threonine  
32 Phosphatase PstP, in the model organism *Mycobacterium smegmatis*. We show  
33 that the peptidoglycan regulator CwIM is a substrate of PstP. We find that a  
34 phospho-mimetic mutation, *pstP* T171E, slows growth, mis-regulates both  
35 mycolic acid and peptidoglycan metabolism in different conditions, and interferes  
36 with antibiotic tolerance. These data suggest that phosphorylation on PstP  
37 affects its activity against various substrates and is important in the transition  
38 between growth and stasis.

39

40 **Importance**

41 Regulation of cell wall assembly is essential for bacterial survival and contributes  
42 to pathogenesis and antibiotic tolerance in mycobacteria, including pathogens  
43 such as *Mycobacterium tuberculosis*. However, little is known about how the cell  
44 wall is regulated in stress. We describe a pathway of cell wall modulation  
45 in *Mycobacterium smegmatis* through the only essential Ser/Thr phosphatase,  
46 PstP. We showed that phosphorylation on PstP is important in regulating

47 peptidoglycan metabolism in the transition to stasis and mycolic acid metabolism  
48 in growth. This regulation also affects antibiotic tolerance in growth and  
49 stasis. This work helps us to better understand the phosphorylation-mediated cell  
50 wall regulation circuitry in Mycobacteria.

51

## 52 **Introduction**

53

54 Tuberculosis (TB), an infectious disease caused by the bacterium  
55 *Mycobacterium tuberculosis* (*Mtb*) is one of the leading causes of death from  
56 infectious diseases (1). The fact that TB treatment requires at least a six month  
57 regimen with four antibiotics is partly due to the intrinsic antibiotic tolerance of  
58 *Mtb* (2, 3). Stressed *Mtb* cells can achieve a dormant or slow-growing state (4, 5)  
59 which exhibits antibiotic tolerance (6), cell wall thickening (7) and altered cell-wall  
60 staining (4).

61 The currently accepted cell wall structure of *Mtb* (8) is composed of three  
62 covalently linked layers (9): surrounding the plasma membrane, a peptidoglycan  
63 (PG) layer is covalently bound to an arabinogalactan layer. A lipid layer  
64 composed of mycolic acids surrounds the arabinogalactan layer, and the inner  
65 leaflet of this layer is covalently linked to the arabinogalactan (10). The outer  
66 leaflet of the mycolic acid layer contains free mycolic acids, trehalose mycolates  
67 and other lipids, glycolipids, glycans and proteins (11). The mycolic acid layer, or  
68 mycomembrane, is the outer membrane of mycobacteria and is the major  
69 contributor to impermeability of the cell wall (12-14).

70 In addition to serving as a permeability barrier, regulation of the cell wall likely  
71 contributes to antibiotic tolerance, either through further changes in permeability  
72 (15), or by changing the activity of antibiotic targets (16). Several studies have  
73 observed changes in the cell wall under stress (7, 15, 17, 18). These cell wall  
74 changes have been shown to correlate with increased antibiotic tolerance (19-  
75 21). This has led the prevalent model that stress-induced regulation of the cell  
76 wall contributes to antibiotic tolerance (22). While most of the extant data to  
77 support this model is correlative, we recently identified a mutant in *Msmeg* which  
78 specifically upregulates peptidoglycan metabolism in starvation and also causes  
79 decreased antibiotic tolerance in that condition (23). This shows that there is a  
80 causal relationship between cell wall regulation and antibiotic tolerance, at least  
81 in limited conditions in *Msmeg*.

82 Reversible protein phosphorylation is a key regulatory tool used by bacteria for  
83 environmental signal transduction to regulate cell growth (24-27). In *Mtb*,  
84 Serine/Threonine phosphorylation is important in cell wall regulation (28). *Mtb*  
85 has 11 Serine/Threonine Protein Kinases (STPKs) (PknA, PknB and PknD-L)  
86 and only one Serine/Threonine protein phosphatase (PstP) (29, 30).

87

88 Among the STPKs, PknA and PknB are essential for growth, and phosphorylate  
89 substrates many involved in cell growth and division (23, 31-34). Some of these  
90 substrates are enzymes whose activity is directly altered by phosphorylation. For  
91 example, all the enzymes in the FAS-II system of mycolic acid biosynthesis are  
92 inhibited by threonine phosphorylation (35-39). There are also cell wall regulators

93 that are not enzymes, but whose phosphorylation by STPKs affects cell shape  
94 and growth. For example, the regulator CwIM, once it is phosphorylated by PknB,  
95 activates MurA (23), the first enzyme in PG precursor biosynthesis (40). In the  
96 transition to starvation, CwIM is rapidly dephosphorylated in *Msmeg* (23). Mis-  
97 regulation of MurA activity increases sensitivity to antibiotics in early starvation  
98 (23), implying that phospho-regulation of CwIM promotes antibiotic tolerance.  
99 CwIM may also regulate other steps of PG synthesis (41). A recent phospho-  
100 proteomic study showed that transcriptional repression of the operon that  
101 contains both *pstP* and *pknB* leads to increased phosphorylation of CwIM (42).  
102 While the effects of the individual genes were not separated (42), this suggests  
103 that PstP could dephosphorylate CwIM.

104

105 PstP is essential in *Mtb* and *Msmeg* (43, 44). It is a member of the Protein  
106 phosphatase 2C (PP2C) subfamily of metal-dependent protein Serine/Threonine  
107 phosphatases (45) which strictly require divalent metal ions for activity (46, 47).  
108 PP2C phosphatases are involved in responding to environmental signals,  
109 regulating metabolic processes, sporulation, cell growth, division and stress  
110 response in a diverse range of prokaryotes and eukaryotes (48-53). PstP<sub>*Mtb*</sub>  
111 shares structural folds and conserved residues with the human PP2C $\alpha$  (54),  
112 which serves as the representative of the PP2C family. PstP<sub>*Mtb*</sub> has an N-terminal  
113 cytoplasmic enzymatic domain, a transmembrane pass and a C-terminal  
114 extracellular domain (45).

115

116 Many of the proteins known to be dephosphorylated by PstP (35, 45, 55-58) are  
117 involved in cell wall metabolism; however, the effects of this activity seem to  
118 differ. For example, dephosphorylation of CwIM should decrease PG metabolism  
119 in stasis (23). But, dephosphorylation of the FAS-II enzymes (35-37, 59-61)  
120 should upregulate lipid metabolism in growth. However, PG and lipid metabolism  
121 are expected to be coordinated (22). Therefore, PstP must be able to alter  
122 substrate specificity in growth and stasis.

123

124 PstP<sub>Mtb</sub> is itself phosphorylated on Threonine residues 137, 141, 174 and 290  
125 (55). We hypothesized that phosphorylation of the threonine residues of PstP  
126 might help coordinate activity against different substrates through changes in  
127 access to substrates, or through toggling catalytic activity against substrates.

128

129 We report here that phospho-ablative and phospho-mimetic mutations at the  
130 phospho-site T171 of PstP<sub>Msmeg</sub> (T174 in PstP<sub>Mtb</sub>) alter growth rate, cell length,  
131 cell wall metabolism and antibiotic tolerance in *Msmeg*. Strains of *Msmeg* with  
132 *pstP* T171E alleles grow slowly, are unable to properly downregulate PG  
133 metabolism and upregulate antibiotic tolerance in the transition to starvation. We  
134 observed that the same mutation has nearly opposite effects on mycolic acid  
135 layer metabolism. We also report that PstP<sub>Mtb</sub> dephosphorylates CwIM<sub>Mtb</sub>.

136

137

138

## 139 **Materials and Methods**

140

### 141 **Bacterial strains and culture conditions**

142

143 All *Mycobacterium smegmatis* mc<sup>2</sup>155 ATCC 700084 cultures were started in  
144 7H9 (Becton, Dickinson, Franklin Lakes, NJ) medium containing 5 g/liter bovine  
145 serum albumin (BSA), 2 g/liter dextrose, 0.003 g/liter catalase, 0.85 g/liter NaCl,  
146 0.2% glycerol, and 0.05% Tween 80 and incubated at 37°C until log. phase.  
147 Hartmans-de Bont (HdB) minimal medium made as described previously (62)  
148 without glycerol was used for starvation assays. Serial dilutions of all CFU counts  
149 were plated on LB Lennox agar (Fisher BP1427-2).

150

151 *E. coli* Top10, XL1Blue and Dh5 $\alpha$  were used for cloning and *E. coli* BL21 Codon  
152 Plus was used for protein expression. Antibiotic concentrations for *M. smegmatis*  
153 were 25  $\mu$ g/ml kanamycin, 50  $\mu$ g/ml hygromycin and 20  $\mu$ g/ml zeocin. Antibiotic  
154 concentrations for *E. coli* were 50  $\mu$ g/ml kanamycin, 25  $\mu$ g/ml zeocin, 20  $\mu$ g/ml  
155 chloramphenicol and 140  $\mu$ g/ml ampicillin.

156

### 157 **Strain construction**

158

159 The PstP<sub>Msmeg</sub>-knockdown strain was made first by creating a merodiploid strain  
160 and then by deleting the native *pstP*<sub>Msmeg</sub> gene from its chromosomal location.  
161 The merodiploid strain was generated by introducing a constitutively expressing

162 *pstP<sub>Mtb</sub>* gene cloned on an StrR plasmid at the L5 attB integration site. The  
163 *pstP<sub>Msmeg</sub>* gene (MSMEG\_0033) at the native locus was then deleted by RecET-  
164 mediated double stranded recombineering approach using a 1.53 kb loxP-hyg-  
165 loxP fragment carrying a 125 bp regions flanking the *pstP<sub>Msmeg</sub>* gene, as  
166 described (63). The recombineering substrate was generated by two sequential  
167 overlapping PCR of the loxP-hyg-loxP substrate present in the plasmid pKM342.  
168 The downstream flanking primer used in the first PCR also carried an optimized  
169 mycobacterial ribosome binding site in front of the start codon of MSMEG\_0032  
170 to facilitate the expression of the genes present downstream of *pstP<sub>Msmeg</sub>* in the  
171 *Msmeg pstP-pknB* operon.

172

173 Deletion of the *pstP<sub>Msmeg</sub>* gene was confirmed by PCR amplification and  
174 sequencing of the 5' and 3' recombinant junctions, and the absence of an internal  
175 wild-type *pstP<sub>Msmeg</sub>* PCR product. The *pstP<sub>Mtb</sub>* allele present at the L5 site was  
176 then swapped, as described (64), with a tet-regulatable *pstP<sub>Mtb</sub>* allele (RevTetR-  
177 P750- *pstP<sub>Mtb</sub>*-DAS tag-L5-Zeo plasmid). The loxP-flanked *hyg* marker present in  
178 the chromosomal locus was then removed by expressing Cre from pCre-sacB-  
179 Kan, and the Cre plasmid was subsequently cured from this strain by plating on  
180 sucrose. We named this strain CB1175.

181

182 Different alleles of *pstP* were attained by swapping the Wild-type (WT) allele at  
183 L5 site of CB1175 as described (65). In order to do so, the wild-type (WT) and  
184 the phosphoablative alleles of *pstP<sub>Msmeg</sub>* alleles were at first cloned individually



185 into a kanamycin resistant-marked L5 vector pCT94 under a TetO promoter to  
186 generate vectors pCB1206-1208 and pCB1210, which would swap out the  
187 zeocin-resistance marked vector at the L5 site in CB1175. The strong TetO  
188 promoter in the vectors pCB1206-1208 and pCB1210 was swapped with an  
189 intermediate strength promoter p766TetON6 (cloned from the vector pCB1030  
190 (pGMCgS-TetON-6 sspB) to generate the L5 vectors pCB1282-85. pCB1285  
191 was used as the parent vector later on to clone in the phosphomimetic *pstP<sub>Msmeg</sub>*  
192 alleles under p766TetON6.

193

194 These kanamycin resistance-marked vector constructs were then used to swap  
195 out the zeocin resistance-marked vector at the L5 site of CB1175 to attain  
196 different allelic strains of *pstP<sub>Msmeg</sub>* as described (65).

197

### 198 **Growth Curve assay**

199

200 At least three biological replicates of different *pstP<sub>Msmeg</sub>* allele strains were grown  
201 in 7H9 media up to log. phase. The growth curves were performed in non-treated  
202 96 well plate using plate reader (BioTek Synergy neo2 multi mode reader) in  
203 200µl 7H9 media starting at OD<sub>600</sub>=0.1. Exponential growth equation was used to  
204 calculate the doubling times of each strain using the least squared ordinary fit  
205 method in GraphPad Prism (Version 7.0d). P values were calculated using two-  
206 tailed, unpaired t-tests.

207

## 208 **Cell staining**

209

210 For staining cells in log. phase, 100 $\mu$ l culture in 7H9 was incubated at 37°C with

211 1 $\mu$ l of 10mM DMN-Tre for 30 minutes and 1 $\mu$ l of 10mM HADA for 15 minutes.

212 Cells were then pelleted and resuspended in 1x phosphate buffered saline (PBS)

213 supplemented with 0.05% Tween 80 and fixed with 10 $\mu$ l of 16%

214 paraformaldehyde (PFA) for 10 minutes at room temperature. Cells were then

215 washed and resuspended in PBS + Tween 80.

216

217 For starvation microscopy, cultures were shaken for 4 hours in HdB media

218 without glycerol at 37°C. 500 $\mu$ l of each culture were pelleted and concentrated to

219 100 $\mu$ l, then incubated at 37°C with 1 $\mu$ l of 10mM DMN-Tre for 1 hour and 3 $\mu$ l of

220 10mM HADA for 30 minutes. Cells were then washed and fixed as above. The

221 total time of starvation before fixation was 5.5 hours.

222

## 223 **Microscopy and Image Analysis**

224

225 Cells were imaged with a Nikon Ti-2 widefield epifluorescence microscope with a

226 Photometrics Prime 95B camera and a Plan Apo 100x, 1.45 NA objective lens.

227 The green fluorescence images for DMN-Tre staining were taken with a

228 470/40nm excitation filter and a 525/50nm emission filter. Blue fluorescence

229 images for HADA staining were taken using 350/50nm excitation filter and

230 460/50nm emission filter. All images were captured using NIS Elements software

231 and analyzed using FIJI and MicrobeJ (66). For cell detection in MicrobeJ,  
232 appropriate parameters for length, width and area were set. The V-snapping cells  
233 were split at the septum so that each daughter cell could be considered as a  
234 single cell. Any overlapping cells were excluded from analysis.

235

236 Length and mean-intensities of HADA and DMN-Tre signals of 300 cells from  
237 each strain (100 cells per replicate) were quantified using MicrobeJ. The values  
238 of the mean intensities of 300 cells of each strain are represented in the graph as  
239 percentages of the highest mean intensity from all the cells in that experiment.

240 An unpaired, two-tailed t-test was performed on the means of the 300  
241 percentage-intensity values of each strain.

242

## 243 **Western Blots**

244

245 Cultures were grown in 7H9 to  $OD_{600}=0.8$  in 10ml 7H9 media, pelleted and  
246 resuspended in 500 $\mu$ L PBS with 1mM PMSF and lysed (MiniBeadBeater-16,  
247 Model 607, Biospec). Supernatants from the cell lysate were run on 12%  
248 resolving Tris-Glycine gels and then transferred onto PVDF membrane (GE  
249 Healthcare). Rabbit  $\alpha$ -strep antibody (1:1000, Abcam, ab76949) in TBST buffer  
250 with 0.5% milk and goat  $\alpha$ -rabbit IgG (H+L) HRP conjugated secondary antibody  
251 (1:10,000, ThermoFisher Scientific 31460) in TBST were used to detect PstP-  
252 strep. For starvation experiments, cultures were first grown to log. phase, then  
253 starved in HdB no glycerol media starting at  $OD=0.5$  for 1.5 hour.

254 For Western blots of *in vitro* assays, samples were run on 12% SDS gel (Mini-  
255 Protean TGX, Biorad, 4561046) and then transferred onto PVDF membrane (GE  
256 Healthcare). Mouse  $\alpha$ -His antibody (1:1000, Genscript A00186) in TBST buffer  
257 with 0.5% BSA and goat  $\alpha$ -mouse IgG (H+L) HRP conjugated secondary  
258 antibody (1:10,000, Invitrogen A28177) were used to detect His-tagged proteins  
259 on the blot. The blots were stripped (Thermo Scientific, 21059) and re-probed  
260 with Rabbit  $\alpha$ -Phospho-Threonine antibody (1:1000, Cell Signaling #9381) and  
261 goat  $\alpha$ -rabbit IgG (H+L) HRP conjugated secondary antibody (1:10,000,  
262 ThermoFisher Scientific 31460) to detect phosphorylation on the blots.

263

#### 264 **Antibiotic assays**

265

266 For antibiotic assays in log. phase, log. phase cultures were diluted in 7H9 media  
267 to OD<sub>600</sub>= 0.05 before treatment. For starvation assays, cells were grown to  
268 OD<sub>600</sub>=0.5, pelleted, washed and resuspended in HdB starvation (with no  
269 glycerol and 0.05% Tween) media at OD<sub>600</sub>=0.3 and incubated at 37°C for a total  
270 of 5.5 hours. The cultures were then diluted to OD<sub>600</sub>=0.05 before antibiotic  
271 treatment. 8  $\mu$ g/ml and 45  $\mu$ g/ml meropenem was used for log. phase and  
272 starved cultures, respectively. 10  $\mu$ g/ml and 90  $\mu$ g/ml isoniazid was added to log.  
273 phase and starved cultures, respectively. 100  $\mu$ g/ml and 900  $\mu$ g/ml D-cycloserine  
274 was used for log. phase and starved cultures, respectively. 50  $\mu$ g/ml and 360  
275  $\mu$ g/ml trimethoprim was added to log. phase and starved cultures, respectively.  
276 Samples from the culture were serially diluted and plated on LB agar before and

277 after treatment, and colony forming units were calculated.

278

## 279 **Protein Purification**

280

281 All the proteins were expressed using *E. coli* BL21 Codon Plus cells.

282 N-terminally his-MBP tagged PknB<sub>Mtb</sub> was expressed and purified as described

283 (67). His-PstP<sub>c</sub>WT<sub>Mtb</sub> (1-300 amino acids of the cytosolic domain, (68)) and His-

284 SUMO-CwIM<sub>Mtb</sub> were both expressed overnight by IPTG induction (1mM and

285 1.3mM, respectively), purified on Ni-NTA resin (G-Biosciences, #786-940 in 5 ml

286 Bio-Scale™ Mini Cartridges, BioRad #7324661), then dialyzed, concentrated and

287 run over size exclusion resin (GE Biosciences Sephacryl S-200 in HiPrep 26/70

288 column) to obtain soluble proteins. The buffer for His-SUMO-CwIM<sub>Mtb</sub> was 50mM

289 Tris pH 8, 350mM NaCl, 1mM DTT and 10% glycerol. The buffer for His-

290 PstP<sub>c</sub>WT<sub>Mtb</sub> was 50mM Tris pH 7.5, 350mM NaCl, 1mM DTT and 10% glycerol.

291 20mM imidazole was added to each buffer for lysis and application to the Ni-NTA

292 column, and 250mM imidazole was added for elution. His-PstP<sub>c</sub>T174E<sub>Mtb</sub> was

293 expressed and purified using the same conditions and buffers used for His-

294 PstP<sub>c</sub>WT<sub>Mtb</sub>.

295

## 296 ***In vitro* Dephosphorylation assay**

297

298 Purified His-SUMO-CwIM<sub>Mtb</sub> was phosphorylated with the purified kinase His-

299 MBP-PknB<sub>Mtb</sub> for 1 hour at room temperature in presence of 0.5mM ATP, 1mM

300 MnCl<sub>2</sub> and buffer (50mM Tris pH 7.5, 250mM NaCl, and 1mM DTT). The amount  
301 of kinase was one-tenth of the amount of substrate in the phosphorylation  
302 reaction. To stop the kinase reaction by depleting ATP, 0.434 units of calf  
303 intestinal alkaline phosphatase (Quick CIP, NEB, MO525S) per µg of His-SUMO-  
304 CwIM<sub>Mtb</sub> was added to the reaction mixture and incubated for 1 hour at 37°C. The  
305 reaction mixture was then divided into five parts for the different phosphatase  
306 samples and a control with buffer.

307

308 Two individually expressed and purified batches of both His-PstP<sub>c</sub>WT<sub>Mtb</sub> and His-  
309 PstP<sub>c</sub>T1714E<sub>Mtb</sub> were used as biological replicates to perform the  
310 dephosphorylation assay. The reaction was carried out at room temperature for  
311 up to 90 minutes in presence of phosphatase buffer (50mM Tris pH 7.5, 10mM  
312 MnCl<sub>2</sub>, and 1mM DTT). The amount of phosphatase used was half the amount of  
313 His-SUMO-CwIM<sub>Mtb</sub>.

314

315 The intensities of the α-His and the α-Phospho-Threonine signals on the blots  
316 were quantified with FIJI. The intensities of the α-His and the α-Phospho-  
317 Threonine signals at each time-point were normalized against the respective  
318 antibody-signal intensity at 0m. These relative intensities were used to calculate  
319 α-Phospho-Threonine/α-His for each time-point and the values were plotted over  
320 time using GraphPad Prism (version 7.0d).

321

322

## 323 Results

324

### 325 Phospho-site T171 of PstP<sub>Msmeg</sub> impacts growth rate

326

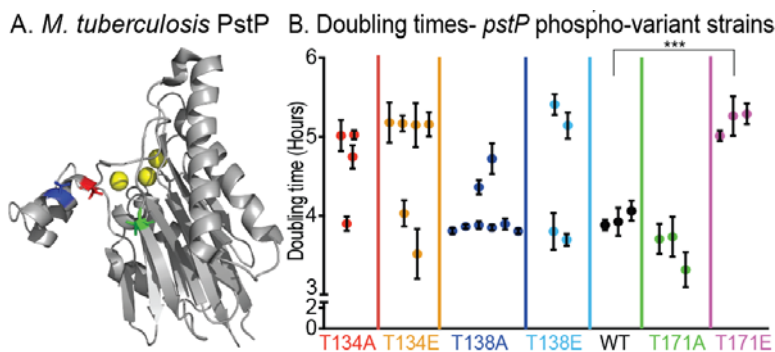

327

328

### 329 FIG 1. Phospho-site T171 on PstP affects growth.

330 (A) Crystal structure of PstP from *M. tuberculosis* (PstP<sub>Mtb</sub>) (54). The threonine (T) sites  
331 on PstP<sub>Mtb</sub> phosphorylated by the kinases PknA and PknB (55) are highlighted on the  
332 structure: red- PstP<sub>Mtb</sub> T137 (T134 in PstP<sub>Msmeg</sub>), blue- PstP<sub>Mtb</sub> T141 (T138 in PstP<sub>Msmeg</sub>)  
333 and green- PstP<sub>Mtb</sub> T174 (T171 in PstP<sub>Msmeg</sub>).

334 B) Doubling times of strains containing *pstP*<sub>Msmeg</sub> WT, phospho-ablative mutant alleles  
335 *pstP*<sub>Msmeg</sub> T134A, T138A and T171A and phospho-mimetic mutant alleles *pstP*<sub>Msmeg</sub>  
336 T134E, T138E and T171E. Each dot is the mean of doubling times from two to three  
337 different experiments on different dates of a single isolated clone. The error bars  
338 represent the standard deviation. P value= 0.0009.

339

340 PstP is necessary for cell growth in *Msmeg* (42, 43) and phosphorylation  
341 increases PstP<sub>Mtb</sub>'s activity against small molecule substrates *in vitro* (42, 43, 55).  
342 To see if the phosphorylations on PstP regulate cell growth, we made *Msmeg*

343 strains with either phospho-ablative (T>A) or phospho-mimetic (T>E) alleles (69)  
344 at each of the three conserved phosphorylation sites of PstP<sub>Mtb</sub> (42, 43, 55) (Fig.  
345 1A) and performed growth curves. We found that biological replicates of the  
346 T134A, T134E, T138A and T138E mutant strains had bi-modal distributions of  
347 doubling times (Fig. 1B). Phospho-sites T134 and T138 in PstP<sub>Mtb</sub> map to the flap  
348 subdomain (54) (Fig. 1A). This subdomain varies greatly in sequence and  
349 structure across different PP2C family members and has been shown to be  
350 important in regulating substrate binding, specificity and catalytic activity (54, 70-  
351 72). Particularly, T138A and T138E variants of the serine threonine phosphatase  
352 tPphA from *Thermosynechococcus elongatus* showed differences in substrate  
353 reactivity (70). This suggests that phosphorylation at T134 and T138 could be  
354 very important in regulating the normal activity of PstP<sub>Msmeg</sub> in the cell. We think  
355 that the inconsistent doubling times of those strains result may result from the  
356 formation of suppressor mutants, which we will study in future work.

357 The *Msmeg* strains with *pstP* T171A and T171E mutations showed consistent  
358 and reproducible growth rates (Fig. 1B). The T171A mutants showed no  
359 significant difference in doubling time compared to the wild-type, but the T171E  
360 grew more slowly than the wild-type. Since T171E mimics constitutive  
361 phosphorylation, this result suggests that the continuous presence of a  
362 phosphate on T171 downregulates or interferes with cell growth.

363

364

365



366 **PstP<sub>Mtb</sub> WT and PstP<sub>Mtb</sub> T174E dephosphorylate CwIM<sub>Mtb</sub> *in vitro*.**

367 Only a few substrates of PstP have been biochemically verified: some STPKs  
368 including PknA and PknB, (45, 55, 57, 58), KasA and KasB (35, 55, 57), and  
369 EmbR (56). The STPK PknB phosphorylates CwIM, which is an activator of PG  
370 biosynthesis (23). CwIM is rapidly dephosphorylated in the transition to starvation  
371 in *Msmeg* (23), and becomes hyper-phosphorylated when PstP is depleted in  
372 *Msmeg* (42) which suggests PstP dephosphorylates CwIM.

373

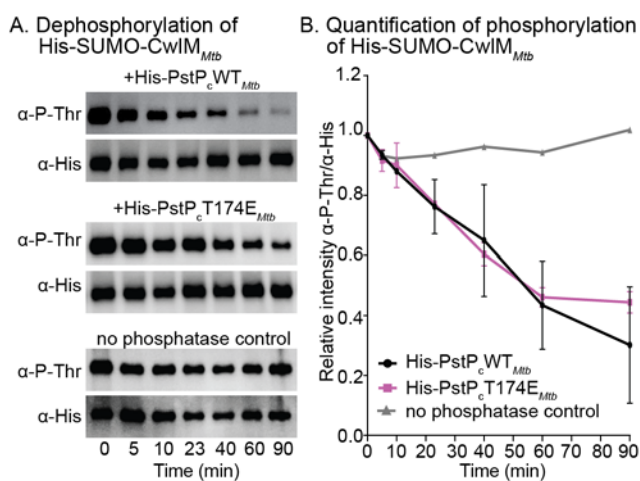

374

375 **FIG 2 PstP<sub>Mtb</sub> dephosphorylates CwIM<sub>Mtb</sub>.**

376 (A)  $\alpha$ -P-Thr and  $\alpha$ -His Western blots of *in vitro* phosphatase reactions with His-  
377 PstP<sub>c</sub>WT<sub>Mtb</sub> (top panel) and His-PstP<sub>c</sub>T174E<sub>Mtb</sub> (middle panel), and no phosphatase  
378 control (bottom panel) and phosphorylated His-SUMO-CwIM<sub>Mtb</sub>. Assay was performed at  
379 least twice with two individually purified batches of each phosphatase, one set of images  
380 is shown here.

381 (B) Quantification of relative intensities of  $\alpha$ -P-Thr over  $\alpha$ -His on Western blots. P values  
382 were calculated using two-tailed unpaired t-test. All the P values of WT vs T171E at any  
383 given time were non-significant. P values of WT vs T171E at 5min = 0.682669, 10min-

384 0.809025, 23min= 0.933929, 40min= 0.831124, 60min= 0.876487 and 90min=  
385 0.545030. The error bars represent standard error of means.

386

387 To test whether PstP and its T174 (T171 in *Msmeg*) phospho-mimetic variant  
388 directly dephosphorylate CwIM, we performed an *in vitro* biochemical assay with  
389 purified *Mtb* proteins. We purified His-MBP-PknB<sub>*Mtb*</sub>, His-SUMO-CwIM<sub>*Mtb*</sub> and the  
390 cytoplasmic region of PstP<sub>*Mtb*</sub> that has the catalytic domain (His-PstP<sub>c</sub>WT<sub>*Mtb*</sub> or  
391 PstP<sub>c</sub>T174E<sub>*Mtb*</sub>). PstP dephosphorylates itself rapidly (55), so the purified form is  
392 unphosphorylated. We phosphorylated His-SUMO-CwIM<sub>*Mtb*</sub> by His-MBP-PknB<sub>*Mtb*</sub>,  
393 stopped the phosphorylation reaction with Calf Intestinal Phosphatase, and then  
394 added His-PstP<sub>c</sub>WT<sub>*Mtb*</sub> or PstP<sub>c</sub>T174E<sub>*Mtb*</sub> to His-SUMO-CwIM<sub>*Mtb*</sub>~P. Our control  
395 assay with His-SUMO-CwIM~P without PstP<sub>c</sub>WT<sub>*Mtb*</sub> or PstP<sub>c</sub>T174E<sub>*Mtb*</sub> showed  
396 that the phosphorylation on the substrate is stable (Fig. 2A, bottom panel). The  
397 phosphorylation signal on His-SUMO-CwIM<sub>*Mtb*</sub> started decreasing within 5  
398 minutes after addition of His-PstP<sub>c</sub>WT<sub>*Mtb*</sub> and kept decreasing over a period of 90  
399 minutes (Fig. 2A, top panel). This is direct biochemical evidence that the PG-  
400 regulator CwIM<sub>*Mtb*</sub> is a substrate of PstP<sub>*Mtb*</sub>. We observed that the WT and T174  
401 phospho-mimetic forms of PstP<sub>*Mtb*</sub> have no significant differences in activity  
402 against His-SUMO-CwIM<sub>*Mtb*</sub>~P *in vitro* (Fig. 2B).

403

404 These data show that, *in vitro*, the activity of the catalytic domain of PstP against  
405 a single substrate is not affected by a negative charge on T171<sub>*Msmeg*</sub>/T174<sub>*Mtb*</sub>. The  
406 phenotypes of the full-length *pstP* T171 phospho-alleles (Fig. 1B, 3, 4 and 5)

407 indicate that this *in vitro* data do not reflect the full complexity of PstP's regulation

408 *in vivo*.

409

### 410 **Phospho-site T171 of PstP<sub>Msmeg</sub> regulates cell length**

411 To assess how the phospho-site T171 affects growth, we examined the cell

412 morphology of *pstP* T171 mutants and wild-type (Fig. 3A and B). The

413 quantification of cell length revealed that the *pstP* T171A cells were shorter

414 (mean=4.0261 ± 0.0755) in log. phase than the wild-type cells (mean= 4.5027 ±

415 0.0704) (Fig. 3A). The *pstP* T171E strain has cell lengths similar to the wild-type

416 (difference between means= 0.05294 ± 0.1163) (Fig. 3A and B) despite the

417 slower growth (difference between means= -1.037 ± 0.1161) (Fig. 1B) in log.

418 phase.

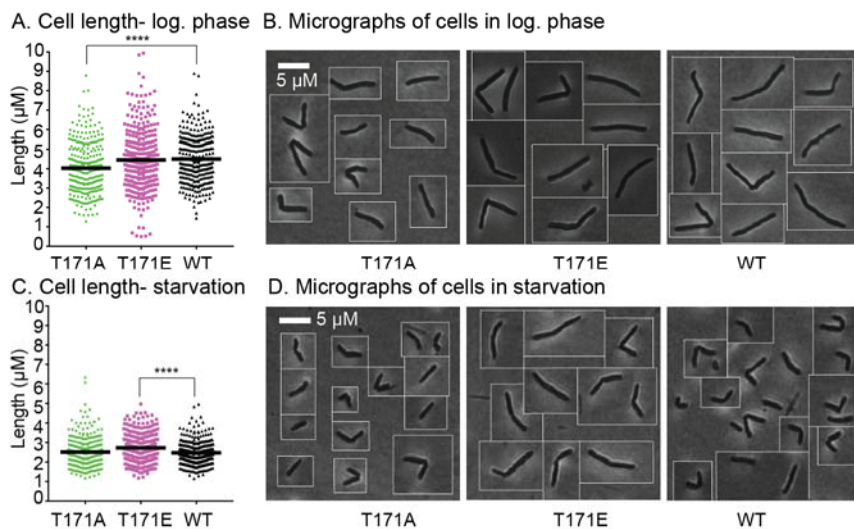

419

### 420 **FIG 3. Phospho-site T171 on PstP<sub>Msmeg</sub> is important in regulating cell length.**

421 (A) Quantification of cell lengths of isogenic *pstP* allele strains (WT, T17A and T171E)

422 grown in 7H9 in log. phase. 100 cells from each of three biological replicates were

423 measured. P values were calculated by unpaired t-test. P value = 0.000005.

424 (B) Representative phase images of cells from (A).

425 (C) Quantification of cell lengths of isogenic *pstP* allele strains (WT, T17A and T171E)

426 after starvation in HdB with no glycerol for five and a half hours. 100 cells from each of

427 three biological replicates were measured. P values were calculated by unpaired t-test.

428 P value= 0.000003.

429 (D) Representative phase images of cells from (C).

430

431 PstP could promote the transition from growth to stasis by downregulating the

432 activity of some cell growth substrates, such as CwlM, PknA or PknB, which all

433 promote growth when phosphorylated (23, 42, 45, 55, 58). PstP likely has

434 dozens of other substrates which may be regulated similarly (23, 42, 45, 55, 58).

435 To test if phospho-site T171 of PstP<sub>Msmeg</sub> affects the transition to stasis, we

436 transferred the strains from log. phase to minimal HdB media with Tween 80 as

437 the only source of carbon, which leads *Msmeg* cells to reductively divide (73).

438 We aerated the cultures for 5.5 hours before imaging (Fig. 3C and D). The

439 effects of phospho-mutations of PstP<sub>Msmeg</sub> on starved cells were the inverse of

440 what we saw in the log. phase. *pstP*<sub>Msmeg</sub> T171E cells in starvation were longer

441 than the wild-type and T171A, and looked like log. phase cells. These data imply

442 that phosphorylation on T171 of PstP<sub>Msmeg</sub> is involved in cell size regulation upon

443 carbon starvation.

444

#### 445 **Phospho-site T171 of PstP<sub>Msmeg</sub> regulates cell wall metabolism**

446 Since *pstP*<sub>Msmeg</sub> T171 seems to play a role in regulating cell length in growth and

447 stasis, we hypothesized that it affects cell wall metabolism in different phases. To

448 test this, we used fluorescent dyes that preferentially stain metabolically active  
449 cell wall(74, 75). We stained T171 allele variant cells from log. phase and after  
450 5.5 hours of carbon starvation with both the fluorescent D-amino acid HADA,  
451 which is incorporated into the PG, (74, 76, 77) (Fig. 4A and C, and Fig. S1A and  
452 B) and the fluorescent trehalose DMN-Tre, which stains the mycomembrane (75)  
453 (Fig. 4B and D, and Fig. S1A and B).

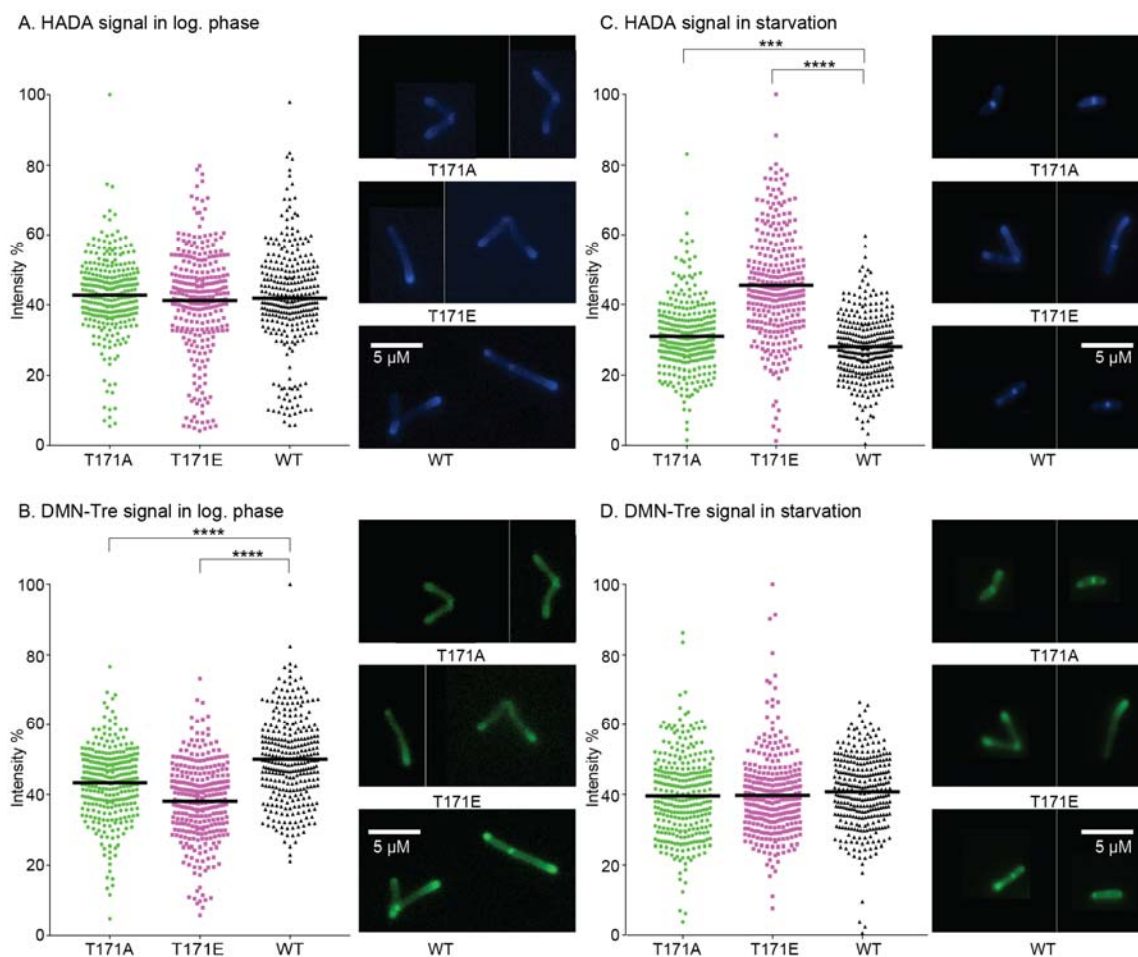

454

455 **FIG 4. Phospho-site T171 of PstP alters cell wall staining.**

456 (A) and (B) Quantification of mean intensities of HADA (A) and DMN-Tre (B) signals of  
457 *pstP* allele strains (WT, T17A and T171E) in log. phase cells. P values of both WT vs.  
458 T171A and WT vs. T171E= 0.000001.

459 (C) and (D) Quantification of mean intensities of HADA (C) and DMN-Tre (D) signals of  
460 starved *pstP* allele strains (WT, T17A and T171E) after 5.5 hours in HdB with no  
461 glycerol. P value of WT vs. T171A= 0.0002 and WT vs. T171E = 0.000001.

462 For all experiments, mean intensities of signals from 100 cells from each of three  
463 biological replicates of every strain were measured using MicrobeJ. The values of the  
464 mean intensities are represented in percentages of the maximum value of all intensities  
465 for all strains. P values were calculated by a two-tailed, unpaired t-test.

466

467 The PG staining intensity between the strains was the same in log. phase (Fig.  
468 4A). In starvation, the *pstP<sub>Msmeg</sub>* T171E mutant stained much more brightly with  
469 HADA than the other strains (Fig. 4C). This suggests that phosphorylation on  
470 PstP<sub>Msmeg</sub> T171 may inhibit the downregulation of PG layer biosynthesis in the  
471 transition to stasis, but that this phospho-site is not important in modulating PG  
472 metabolism during rapid growth.

473

474 Staining with DMN-Tre, which correlates with assembly of the trehalose mycolate  
475 leaflet of the mycomembrane (75), shows the inverse pattern. The strains stain  
476 similarly in starvation (Fig. 4D). In log. phase, however, both mutants show a  
477 significant decrease in DMN-Tre signal compared to the wild-type (Fig. 4B),  
478 although the *pstP<sub>Msmeg</sub>* T171E mutant has the weakest staining. DMN-Tre is  
479 incorporated via Ag85-mediated trehalose mycolate metabolism of the  
480 mycomembrane (75). Its fluorescence is sensitive to the hydrophobicity of the  
481 membrane and to changes in cytoplasmic mycolic acid metabolism (75).

482

483 Our data in Fig. 4A and C suggest that phosphorylation on PstP<sub>Msmeg</sub> T171  
484 impacts PG layer metabolism in starvation, but not growth. But the same  
485 phosphorylation appears to regulate the trehalose mycolate metabolism in  
486 growth, but not starvation (Fig. 4B and D).

487

#### 488 **Phospho-site T171 of PstP<sub>Msmeg</sub> affects antibiotic tolerance**

489 Stresses that arrest cell growth in mycobacteria are associated with increased  
490 antibiotic tolerance (15, 18, 78-80). We hypothesized that if *Msmeg* fails to  
491 downregulate PG synthesis in starvation, (Fig. 4C), then it might be more  
492 susceptible to a PG targeting drug. We treated *pstP<sub>Msmeg</sub>* wild-type, T171A and  
493 T171E strains in log. phase and starvation with meropenem, which targets the  
494 cross-linking in the PG cell wall (81), and quantified survival by CFU. We saw  
495 that the *pstP<sub>Msmeg</sub>* T171E strain was more susceptible in starvation, compared to  
496 *pstP<sub>Msmeg</sub>* T171A and wild-type strains (Fig. 5B), but survived similarly in log.  
497 phase, except at very late time points when it was more tolerant.

498

499 We also treated *pstP<sub>Msmeg</sub>* wild-type, T171A and T171E strains in log. phase and  
500 starvation with D-cycloserine, which inhibits incorporation of D-alanine into PG  
501 pentapeptides in the cytoplasm (82, 83). The results were similar to those in  
502 meropenem: the strains survived similarly in log. phase (Fig. 5C), but the  
503 *pstP<sub>Msmeg</sub>* T171E strain was more sensitive in starvation (Fig. 5D). The apparent  
504 failure of the *pstP<sub>Msmeg</sub>* T171E strain to downregulate PG synthesis (Fig. 4C)



505 likely makes it more sensitive to both the PG inhibitors in starvation (Fig. 5B and  
506 D).

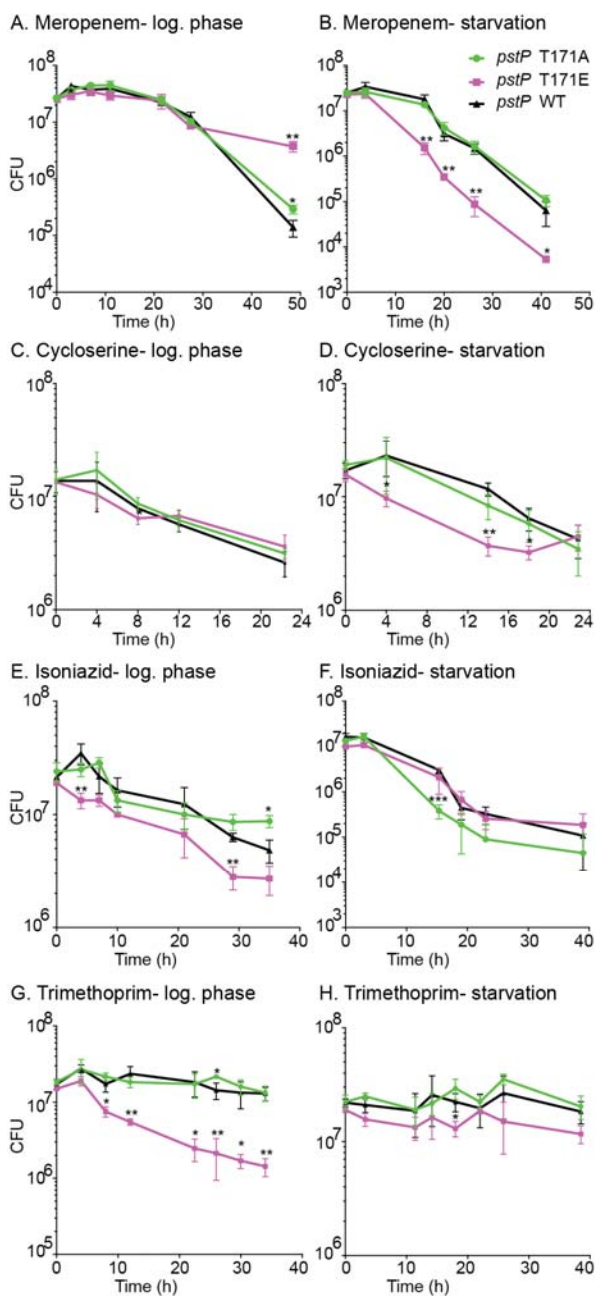

507

508 **FIG 5 Phospho-site T171 of PstP plays a role in antibiotic sensitivity.**

509 Survival of *pstP* allele strains (WT, T17A and T171E) in different media and antibiotics.

510 (A) In 7H9, treated with 8µg/ml of meropenem. P values of WT vs. T171E at 3h=

511 0.043024, WT vs. T171A at 48.5h= 0.001487 and WT vs. T171E at 48.5h = 0.018144.



512 (B) In HdB (no glycerol, 0.05% Tween) for 5.5 hours, then treated with 45µg/ml of  
513 meropenem. P values of WT vs. T171E at 16h= 0.002876, 23h=0.006978, 26.3h=  
514 0.003679 and 41h= =0.045922.

515 (C) In 7H9, treated with 100µg/ml of D-cycloserine. P values of WT vs. T171E at 8h=  
516 0.032189.

517 (D) In HdB (no Glycerol, 0.05% Tween) for 5.5 hours, then treated with 900µg/ml of D-  
518 cycloserine. P values of WT vs. T171E at 3.5h= 0.046062, 14h= 0.001198 and 18h=  
519 0.022088.

520 (E) In 7H9, treated with 10µg/ml of isoniazid. P values of WT vs. T171E at 4h=0.007995,  
521 WT vs. T171E at 29h= 0.001978 and WT vs. T171A at 35h= 0.052499.

522 (F) In HdB (no Glycerol, 0.05% Tween) for 5.5 hours, then treated with 90µg/ml of  
523 isoniazid. P values of WT vs. T171A at 15.3h=0.000848.

524 (G) In 7H9, treated with 50µg/ml of trimethoprim. P values of WT vs. T171E at 4h=  
525 0.022646, 8h= 0.012762, 12h= 0.005294, 22.5h= 0.014885, 26h= 0.004690, 30h=  
526 0.017293 and 34h= 0.001694.

527 (H) In HdB (no Glycerol, 0.05% Tween) for 5.5 hours, then treated with 360µg/ml of  
528 trimethoprim. P values of WT vs. T171A at 18h= 0.023064. All experiments were done at  
529 least twice, and representative data are shown. All P values were calculated using two-  
530 tailed, unpaired t-test. All error bars represent standard deviation (SD).

531

532 Next, we treated our wild-type and *pstP<sub>Msmeg</sub>* T171 mutant strains with isoniazid,  
533 which targets InhA in the FAS-II pathway of mycolic acid synthesis (84). We do  
534 not see significant differences in isoniazid sensitivity between the strains in  
535 starvation (Fig. 5F). In log. phase, we see that the *pstP<sub>Msmeg</sub>* T171E strain is  
536 more susceptible to isoniazid than the *pstP<sub>Msmeg</sub>* T171A and the wild-type strains

537 (Fig. 5E). Our data (Fig. 5E) suggest that phosphorylation on PstP<sub>Msmeg</sub> T171  
538 mis-regulates the mycolic acid biosynthesis pathway of mycomembrane  
539 metabolism (Fig. 4C), thus increasing isoniazid susceptibility.

540

541 To see if the PstP T171 phospho-site affects susceptibility to a drug that does not  
542 target the cell wall, we treated the strains with trimethoprim, which targets  
543 thymidine biosynthesis in the cytoplasm (85). We see that, in log. phase, *pstP*  
544 T171E is very susceptible to this drug (Fig. 5G), while the wild-type and T171A  
545 strains are tolerant. All strains were tolerant to trimethoprim in starvation (Fig.  
546 5H). This shows that mis-regulation of PstP may impact processes beyond cell  
547 wall metabolism affecting antibiotic tolerance in turn.

548

549 Trimethoprim is a hydrophobic drug which is taken up via passive diffusion (86).  
550 Therefore, permeability to trimethoprim is expected to be affected by changes in  
551 mycomembrane metabolism in log. phase (Fig. 4C and 5E). It is notable that  
552 *pstP* phospho-allele strains in starvation do not exhibit differences in DMN-Tre  
553 staining (Fig. 4D) or isoniazid (Fig. 5F) or trimethoprim sensitivity (Fig. 5H), which  
554 suggests that susceptibility to trimethoprim, could be determined largely by  
555 permeability of the mycomembrane layer. D-cycloserine, on the other hand, is  
556 hydrophilic and therefore its uptake is likely dependent on porins (87, 88), and  
557 therefore less sensitive to changes in the mycomembrane. So, sensitivity to D-  
558 cycloserine (Fig. 5C and D) appears to be largely dependent on regulation of PG  
559 metabolism (Fig. 4A and C).

560 Our data show that phospho-site T171 of PstP regulates mycolic acid layer  
561 biosynthesis in growth, and PG layer metabolism in starvation. Mis-regulation of  
562 PstP can increase sensitivity to cell wall targeting drugs in both growth and  
563 stasis.

564

## 565 **Discussion**

566 Previous studies on mycobacterial phospho-regulation suggest that PstP could  
567 play a critical role in modulating cell wall metabolism in the transition between  
568 growth and stasis (18, 22, 23, 35, 42, 55, 58, 89). In this work, we explored how  
569 the phosphorylation of PstP contributes to this regulation. We report here that  
570 the phospho-site T171 of PstP<sub>Msmeg</sub> impacts growth, cell wall metabolism and  
571 antibiotic tolerance. We found that the PG master regulator CwIM<sub>Mtb</sub> is a  
572 substrate of PstP<sub>Mtb</sub>. Our findings indicate that the phosphorylation on PstP  
573 affects PG metabolism in stasis and the mycolic acid metabolism during growth.

574

575 PG is regulated by phosphorylation factors at several points along the  
576 biosynthesis pathway (23, 41, 67, 90), mostly by PknB. PknB's kinase activity is  
577 responsive to lipid II that it detects in the periplasm (91). PstP is a global negative  
578 regulator of STPK phosphorylation (42) and has been proposed to be the  
579 cognate phosphatase of PknB in regulating cell growth (22, 42, 58, 92). Our data  
580 suggest that mutations at T171 of PstP do not affect PG metabolism in growth  
581 (Fig. 4A), but that the PstP<sub>Msmeg</sub> T171E strain fails to downregulate PG in  
582 starvation (Fig. 4C). We expect that PstP's activity against the PG regulator

583 CwlM (Fig 2A, top panel) should be critical for this downregulation because it  
584 should de-activate MurA, the first enzyme in PG precursor synthesis (23, 40).  
585  
586 The *in vitro* biochemistry (Fig. 2A and B) predicts the log. phase staining data  
587 (Fig. 4A), where the *pstP* T171E variant has no difference in apparent PG  
588 activity. The proximity of a phospho-site to the substrate binding site of an  
589 enzyme may affect the catalytic activity directly (93) but T174 maps to the  $\beta$ -  
590 sheet core ( $\beta$ 8) in PstP<sub>Mtb</sub>, which is distant from the active site (Fig. 1A) (54). The  
591 PG staining in starvation suggests that the PstP<sub>Msmeg</sub> T171E phospho-mimetic  
592 variant might dephosphorylate CwlM more slowly *in vivo* (Fig. 5B), but this is not  
593 what we see *in vitro* (Fig. 2A and B). Therefore, it is possible that, in starvation,  
594 phosphorylation at this site may affect PstP's interaction (94) with other  
595 regulatory proteins (95-97) that could modulate PstP's activity against PG  
596 substrates, or it could affect access to substrates via localization changes.  
597  
598 Synthesis of the various mycobacterial cell wall layers are likely synchronized  
599 (22, 98). PknB almost surely plays a crucial role in connecting PG and mycolic  
600 acid metabolism during growth. If PG metabolism is slowed, PknB could sense  
601 the accumulation of periplasmic lipid II (91) and signal to halt mycolic acid  
602 biosynthesis by inactivating the FAS-II enzymes and the trehalose monomycolate  
603 transporter MmpL3 (92) via phosphorylation (35-37, 59-61, 92). Our data imply  
604 that PstP helps balance the effects of these inhibitory phosphorylations to allow  
605 coordinated synthesis of mycolic acids in log. phase (Fig. 4B and 5E). Mis-

606 phosphorylation of PstP likely disrupts this coordination and seems to decrease  
607 mycolic acid layer metabolism. This may partly explain the slow growth of the  
608 *pstP* T171E mutants (Fig. 1B).

609

610 We propose that PstP's regulation of mycolic acid layer biosynthesis occurs in  
611 the cytoplasm. DMN-Tre incorporation into the mycomembrane is directly  
612 catalyzed by secreted Ag85 enzymes (75, 99), but it is indirectly affected by both  
613 cytoplasmic changes in mycolic acid synthesis (75) and altered mycomembrane  
614 hydrophobicity (100). PstP and all the STPKs work in the cytoplasm, and there  
615 are currently no known systems whereby secreted proteins like Ag85 can be  
616 regulated by phosphorylation. All the enzymes of the FAS-II complex, which  
617 elongates fatty acids into the long lipids used in mycolic acids (84), are  
618 downregulated by phosphorylation (35-37, 59-61), and two are biochemically  
619 verified substrates of PstP (35). MmpL3, the mycolic acid flippase (101), is also  
620 inhibited by phosphorylation (92). It is likely that PstP could affect the activity of  
621 the entire FAS-II complex, including the target of isoniazid, InhA, which is  
622 inactivated by threonine phosphorylation (37, 60). Isoniazid is a small hydrophilic  
623 drug and undergoes active diffusion via the porins (88, 102); therefore,  
624 alterations in mycomembrane permeability are not likely to contribute  
625 substantially to differences in isoniazid sensitivity. Although our data (Fig. 5E)  
626 does not reveal the exact mis-regulated spot in the mycolic acid synthesis and  
627 transport pathway, the higher susceptibility of the phosphomimetic strain (Fig.  
628 5E) to isoniazid suggests that this metabolic pathway is affected. Our DMN-tre

629 staining also suggests that there should be a balance of non-phospho and  
630 phospho-form of PstP<sub>Msmeg</sub> T171 (Fig. 4B) during growth to regulate  
631 mycomembrane biosynthesis.

632

633 PstP may dephosphorylate the cell wall substrates directly, and/ or by de-  
634 activating their kinases (103) in both the PG and mycolic acid biosynthesis  
635 pathways. All these data combined suggest a complex cross-talk of the STPKs  
636 and PstP to regulate diverse cell wall substrates.

637

638

639

640

641

642

643

644

645

646

647

648

649

650

651

652

653

654

655

656

657 **Acknowledgment**

658

659 This work was supported by grants 1R15GM131317-01 and R01AI148917-01A1  
660 to CCB from the National Institutes of Health, and by startup funds from the  
661 University of Texas at Arlington. We thank Kenan Murphy for the plasmids  
662 pDE54MCZD and pKM55 and Dirk Schnappinger for pDE43-MCS and RevTetR  
663 promoter plasmids used in this study.

664

665

666

667

668

669

670

671

672

673

674

675

676

677

678

679

680

681

682 **References:**

- 683 1. **World Health Organization.** 2019. Global Tuberculosis Report 2019.
- 684 2. **Nguyen L.** 2016. Antibiotic resistance mechanisms in *M. tuberculosis*: an  
685 update. *Arch Toxicol* **90**:1585–1604.
- 686 3. **Jarlier V, Nikaido H.** 1994. Mycobacterial cell wall: structure and role in  
687 natural resistance to antibiotics. **123**:11–18.
- 688 4. **Seiler P, Ulrichs T, Bandermann S, Pradl L, Jörg S, Krenn V,**  
689 **Morawietz L, Kaufmann SHE, Aichele P.** 2003. Cell-wall alterations as  
690 an attribute of *Mycobacterium tuberculosis* in latent infection. *J Infect Dis*  
691 **188**:1326–1331.
- 692 5. **Muñoz-Elías EJ, Timm J, Botha T, Chan WT, Gomez JE, McKinney**  
693 **JD.** 2004. Replication Dynamics of *Mycobacterium tuberculosis* in  
694 Chronically Infected Mice. *Infection and immunity* **73**:546–551.
- 695 6. **Wallis RS, Patil S, Cheon SH, Edmonds K, Phillips M, Perkins MD,**  
696 **Joloba M, Namale A, Johnson JL, Teixeira L, Dietze R, Siddiqi S,**  
697 **Mugerwa RD, Eisenach K, Ellner JJ.** 1999. Drug tolerance in  
698 *Mycobacterium tuberculosis*. *Antimicrobial Agents and Chemotherapy*  
699 **43**:2600–2606.
- 700 7. **Cunningham AF, Spreadbury CL.** 1998. Mycobacterial stationary phase  
701 induced by low oxygen tension: cell wall thickening and localization of the  
702 16-kilodalton alpha-crystallin homolog. *J Bacteriol* **180**:801–808.
- 703 8. **Brennan PJ.** 2003. Structure, function, and biogenesis of the cell wall of  
704 *Mycobacterium tuberculosis*. *Tuberculosis* **83**:91–97.
- 705 9. **Minnikin DE.** 1991. Chemical principles in the organization of lipid  
706 components in the mycobacterial cell envelope. *Research in*  
707 *Microbiology* **142**:423–427.
- 708 10. **Kieser KJ, Rubin EJ.** 2014. How sisters grow apart: mycobacterial  
709 growth and division. *Nat Rev Microbiology* **12**:550–562.
- 710 11. **Marrakchi H, Lanéelle M-A, Daffé M.** 2014. Mycolic Acids: Structures,  
711 Biosynthesis, and Beyond. *Chemistry & Biology* **21**:67–85.
- 712 12. **Hett EC, Rubin EJ.** 2008. Bacterial growth and cell division: a  
713 mycobacterial perspective. *Microbiology and Molecular Biology Reviews*  
714 **72**:126–156.
- 715 13. **Hoffmann C, Leis A, Niederweis M, Plitzko JM, Engelhardt H.** 2008.  
716 Disclosure of the mycobacterial outer membrane: cryo-electron



- 717 tomography and vitreous sections reveal the lipid bilayer structure. Proc  
718 Natl Acad Sci USA **105**:3963–3967.
- 719 14. **Jarlier V, Nikaido H.** 1990. Permeability barrier to hydrophilic solutes in  
720 Mycobacterium chelonae. J Bacteriol **172**:1418–1423.
- 721 15. **Sarathy J, Dartois V, Dick T, Gengenbacher M.** 2013. Reduced Drug  
722 Uptake in Phenotypically Resistant Nutrient-Starved Nonreplicating  
723 Mycobacterium tuberculosis. Antimicrobial Agents and Chemotherapy  
724 **57**:1648–1653.
- 725 16. **Batt SM, Burke CE, Moorey AR, Besra GS.** 2020. Antibiotics and  
726 resistance: the two-sided coin of the mycobacterial cell wall. Cell Surf  
727 **6**:100044.
- 728 17. **Bhamidi S, Shi L, Chatterjee D, Belisle JT, Crick DC, McNeil MR.**  
729 2012. A bioanalytical method to determine the cell wall composition of  
730 Mycobacterium tuberculosis grown in vivo. ANALYTICAL  
731 BIOCHEMISTRY **421**:240–249.
- 732 18. **Betts JC, Lukey PT, Robb LC, McAdam RA, Duncan K.** 2002.  
733 Evaluation of a nutrient starvation model of Mycobacterium tuberculosis  
734 persistence by gene and protein expression profiling. Mol Microbiol  
735 **43**:717–731.
- 736 19. **Sarathy JP, Via LE, Weiner D, Blanc L, Boshoff H, Eugenin EA,**  
737 **Clifton BE III, Dartois VA.** 2018. Extreme Drug Tolerance of  
738 Mycobacterium tuberculosis in Caseum. Antimicrobial Agents and  
739 Chemotherapy **62**:2149.
- 740 20. **Xie Z, Siddiqi N, Rubin EJ.** 2005. Differential Antibiotic Susceptibilities of  
741 Starved Mycobacterium tuberculosis Isolates. Antimicrobial Agents and  
742 Chemotherapy **49**:4778–4780.
- 743 21. **Liu Y, Tan S, Huang L, Abramovitch RB, Rohde KH, Zimmerman MD,**  
744 **Chen C, Dartois V, VanderVen BC, Russell DG.** 2016. Immune  
745 activation of the host cell induces drug tolerance in Mycobacterium  
746 tuberculosis both in vitro and in vivo. J Exp Med **213**:809–825.
- 747 22. **Dulberger CL, Rubin EJ, Boutte CC.** 2020. The mycobacterial cell  
748 envelope - a moving target. Nature Reviews Microbiology **18**:47–59.
- 749 23. **Boutte CC, Baer CE, Papavinasasundaram K, Liu W, Chase MR,**  
750 **Meniche X, Fortune SM, Sassetti CM, Ioerger TR, Rubin EJ, Laub M.**  
751 2016. A cytoplasmic peptidoglycan amidase homologue controls  
752 mycobacterial cell wall synthesis. eLife **5**:e14590.
- 753 24. **Echenique J, Kadioglu A, Romao S, Andrew PW, Trombe MC.** 2004.

- 754 Protein Serine/Threonine Kinase StkP Positively Controls Virulence and  
755 Competence in *Streptococcus pneumoniae*. *Infection and immunity*  
756 **72**:2434–2437.
- 757 25. **Juris SJ, Rudolph AE, Huddler D, Orth K, Dixon JE.** 2000. A  
758 distinctive role for the *Yersinia* protein kinase: actin binding, kinase  
759 activation, and cytoskeleton disruption. *Proceedings of the National*  
760 *Academy of Sciences* **97**:9431–9436.
- 761 26. **Galyov EE, Håkansson S, Forsberg Å, Wolf-Watz H.** 1993. A secreted  
762 protein kinase of *Yersinia pseudotuberculosis* is an indispensable  
763 virulence determinant. *Nature* **361**:730–732.
- 764 27. **Wang J, Li C, Yang H, Mushegian A, Jin S.** 1998. A novel  
765 serine/threonine protein kinase homologue of *Pseudomonas aeruginosa*  
766 is specifically inducible within the host infection site and is required for full  
767 virulence in neutropenic mice. *J Bacteriol* **180**:6764–6768.
- 768 28. **Gee CL, Papavinasasundaram KG, Blair SR, Baer CE, Falick AM,**  
769 **King DS, Griffin JE, Venghatakrishnan H, Zukauskas A, Wei JR,**  
770 **Dhiman RK, Crick DC, Rubin EJ, Sasseti CM, Alber T.** 2012. A  
771 Phosphorylated Pseudokinase Complex Controls Cell Wall Synthesis in  
772 *Mycobacteria*. *Science Signaling* **5**:ra7–ra7.
- 773 29. **Av-Gay Y, Everett M.** 2000. The eukaryotic-like Ser/Thr protein kinases  
774 of *Mycobacterium tuberculosis*. *Trends Microbiol* **8**:238–244.
- 775 30. **Cole ST, Brosch R, Parkhill J, Garnier T, Churcher C, Harris D,**  
776 **Gordon SV, Eiglmeier K, Gas S, Barry CE, Tekaia F, Badcock K,**  
777 **Basham D, Brown D, Chillingworth T, Connor R, Davies R, Devlin K,**  
778 **Feltwell T, Gentles S, Hamlin N, Holroyd S, Hornsby T, Jagels K,**  
779 **Krogh A, McLean J, Moule S, Murphy L, Oliver K, Osborne J, Quail**  
780 **MA, Rajandream MA, Rogers J, Rutter S, Seeger K, Skelton J,**  
781 **Squares R, Squares S, Sulston JE, Taylor K, Whitehead S, Barrell**  
782 **BG.** 1998. Deciphering the biology of *Mycobacterium tuberculosis* from  
783 the complete genome sequence. *Nature* **393**:537–544.
- 784 31. **Sasseti CM, Boyd DH, Rubin EJ.** 2003. Genes required for  
785 mycobacterial growth defined by high density mutagenesis. *Mol Microbiol*  
786 **48**:77–84.
- 787 32. **Kang C-M, Abbott DW, Park ST, Dascher CC, Cantley LC, Husson**  
788 **RN.** 2005. The *Mycobacterium tuberculosis* serine/threonine kinases  
789 PknA and PknB: substrate identification and regulation of cell shape.  
790 *Genes & Development* **19**:1692–1704.
- 791 33. **Fernandez P, Saint-Joanis B, Barilone N, Jackson M, Gicquel B, Cole**  
792 **ST, Alzari PM.** 2006. The Ser/Thr Protein Kinase PknB Is Essential for

- 793 Sustaining Mycobacterial Growth. *J Bacteriol* **188**:7778–7784.
- 794 34. **Kusebauch U, Ortega C, Ollodart A, Rogers RS, Sherman DR, Moritz**  
795 **RL, Grundner C.** 2014. Mycobacterium tuberculosis supports protein  
796 tyrosine phosphorylation. *Proceedings of the National Academy of*  
797 *Sciences* **111**:9265–9270.
- 798 35. **Molle V, Brown AK, Besra GS, Cozzone AJ, Kremer L.** 2006. The  
799 Condensing Activities of the Mycobacterium tuberculosis Type II Fatty  
800 Acid Synthase Are Differentially Regulated by Phosphorylation. *J Biol*  
801 *Chem* **281**:30094–30103.
- 802 36. **Slama N, Leiba J, Eynard N, Daffé M, Kremer L, Quémard A, Molle V.**  
803 2011. Negative regulation by Ser/Thr phosphorylation of HadAB and  
804 HadBC dehydratases from Mycobacterium tuberculosis type II fatty acid  
805 synthase system. *Biochemical and Biophysical Research*  
806 *Communications* **412**:401–406.
- 807 37. **Khan S, Nagarajan SN, Parikh A, Samantaray S, Singh A, Kumar D,**  
808 **Roy RP, Bhatt A, Nandicoori VK.** 2010. Phosphorylation of enoyl-acyl  
809 carrier protein reductase InhA impacts mycobacterial growth and survival.  
810 *J Biol Chem* **285**:37860–37871.
- 811 38. **Vilchèze C, Molle V, Carrère-Kremer S, Leiba J, Mourey L, Shenai S,**  
812 **Baronian G, Tufariello J, Hartman T, Veyron-Churlet R, Trivelli X,**  
813 **Tiwari S, Weinrick B, Alland D, Guérardel Y, Jacobs WR, Kremer L.**  
814 2014. Phosphorylation of KasB regulates virulence and acid-fastness in  
815 Mycobacterium tuberculosis. *PLoS Pathog* **10**:e1004115.
- 816 39. **Veyron-Churlet R, Zanella-Cléon I, Cohen-Gonsaud M, Molle V,**  
817 **Kremer L.** 2010. Phosphorylation of the Mycobacterium tuberculosis  
818 beta-ketoacyl-acyl carrier protein reductase MabA regulates mycolic acid  
819 biosynthesis. *J Biol Chem* **285**:12714–12725.
- 820 40. **Marquardt JL, Siegele DA, Kolter R, Walsh CT.** 1992. Cloning and  
821 sequencing of Escherichia coli murZ and purification of its product, a  
822 UDP-N-acetylglucosamine enolpyruvyl transferase. *J Bacteriol* **174**:5748–  
823 5752.
- 824 41. **Turapov O, Forti F, Kadhim B, Ghisotti D, Sassine J, Straatman-**  
825 **Iwanowska A, Bottrill AR, Moynihan PJ, Wallis R, Barthe P, Cohen-**  
826 **Gonsaud M, Ajuh P, Vollmer W, Mukamolova GV.** 2018. Two Faces of  
827 CwlM, an Essential PknB Substrate, in Mycobacterium tuberculosis.  
828 *CellReports* **25**:57–67.e5.
- 829 42. **Iswahyudi, Mukamolova GV, Straatman-Iwanowska AA, Allcock N,**  
830 **Ajuh P, Turapov O, O'Hare HM.** 2019. Mycobacterial phosphatase PstP  
831 regulates global serine threonine phosphorylation and cell division.

- 832 Scientific Reports **9**:8337.
- 833 43. **Sharma AK, Arora D, Singh LK, Gangwal A, Sajid A, Molle V, Singh**  
834 **Y, Nandicoori VK.** 2016. Serine/Threonine Protein Phosphatase PstP of  
835 Mycobacterium tuberculosis Is Necessary for Accurate Cell Division and  
836 Survival of Pathogen. *J Biol Chem* **291**:24215–24230.
- 837 44. **DeJesus MA, Gerrick ER, Xu W, Park SW, Long JE, Boutte CC,**  
838 **Rubin EJ, Schnappinger D, Ehrt S, Fortune SM, Sassetti CM, Ioerger**  
839 **TR.** 2017. Comprehensive Essentiality Analysis of the Mycobacterium  
840 tuberculosis Genome via Saturating Transposon Mutagenesis. *mBio* **8**.
- 841 45. **Chopra P, Singh B, Singh R, Vohra R, Koul A, Meena LS, Koduri H,**  
842 **Ghildiyal M, Deol P, Das TK, Tyagi AK, Singh Y.** 2003. Phosphoprotein  
843 phosphatase of Mycobacterium tuberculosis dephosphorylates serine–  
844 threonine kinases PknA and PknB. *Biochemical and Biophysical*  
845 *Research Communications* **311**:112–120.
- 846 46. **Barford D.** 1996. Molecular mechanisms of the protein serine/threonine  
847 phosphatases. *Trends Biochem Sci* **21**:407–412.
- 848 47. **Cohen P.** 1989. The structure and regulation of protein phosphatases.  
849 *Annu Rev Biochem* **58**:453–508.
- 850 48. **Mougous JD, Gifford CA, Ramsdell TL, Mekalanos JJ.** 2007.  
851 Threonine phosphorylation post-translationally regulates protein secretion  
852 in *Pseudomonas aeruginosa*. *Nat Cell Biol* **9**:797–803.
- 853 49. **Irmiler A, Forchhammer K.** 2001. A PP2C-type phosphatase  
854 dephosphorylates the PII signaling protein in the cyanobacterium  
855 *Synechocystis* PCC 6803. *Proceedings of the National Academy of*  
856 *Sciences* **98**:12978–12983.
- 857 50. **Bradshaw N, Losick R.** 2015. Asymmetric division triggers cell-specific  
858 gene expression through coupled capture and stabilization of a  
859 phosphatase. *eLife* **4**.
- 860 51. **Bradshaw N, Levdikov VM, Zimanyi CM, Gaudet R, Wilkinson AJ,**  
861 **Losick R.** 2017. A widespread family of serine/threonine protein  
862 phosphatases shares a common regulatory switch with proteasomal  
863 proteases. *eLife* **6**:e26111.
- 864 52. **Lu G, Wang Y.** 2008. Functional diversity of mammalian type 2C protein  
865 phosphatase isoforms: new tales from an old family. *Clin Exp Pharmacol*  
866 *Physiol* **35**:107–112.
- 867 53. **Vijay K, Brody MS, Fredlund E, Price CW.** 2000. A PP2C phosphatase  
868 containing a PAS domain is required to convey signals of energy stress to

- 869 the sigmaB transcription factor of *Bacillus subtilis*. *Mol Microbiol* **35**:180–  
870 188.
- 871 54. **Pullen KE, Ng H-L, Sung P-Y, Good MC, Smith SM, Alber T.** 2004. An  
872 Alternate Conformation and a Third Metal in PstP/Ppp, the M.  
873 tuberculosis PP2C-Family Ser/Thr Protein Phosphatase. *Structure*  
874 **12**:1947–1954.
- 875 55. **Sajid A, Arora G, Gupta M, Upadhyay S, Nandicoori VK, Singh Y.**  
876 2011. Phosphorylation of *Mycobacterium tuberculosis* Ser/Thr  
877 Phosphatase by PknA and PknB. *PLoS ONE* **6**:e17871–11.
- 878 56. **Sharma K, Gupta M, Krupa A, Srinivasan N, Singh Y.** 2006. EmbR, a  
879 regulatory protein with ATPase activity, is a substrate of multiple  
880 serine/threonine kinases and phosphatase in *Mycobacterium*  
881 *tuberculosis*. *FEBS J* **273**:2711–2721.
- 882 57. **Durán R, Villarino A, Bellinzoni M, Wehenkel A, Fernandez P, Boitel**  
883 **B, Cole ST, Alzari PM, Cerveñansky C.** 2005. Conserved  
884 autophosphorylation pattern in activation loops and juxtamembrane  
885 regions of *Mycobacterium tuberculosis* Ser/Thr protein kinases.  
886 *Biochemical and Biophysical Research Communications* **333**:858–867.
- 887 58. **Boitel B, Ortiz-Lombardía M, Durán R, Pompeo F, Cole ST,**  
888 **Cerveñansky C, Alzari PM.** 2003. PknB kinase activity is regulated by  
889 phosphorylation in two Thr residues and dephosphorylation by PstP, the  
890 cognate phospho-Ser/Thr phosphatase, in *Mycobacterium tuberculosis*.  
891 *Mol Microbiol* **49**:1493–1508.
- 892 59. **Veyron-Churlet R, Zanella-Cléon I.** 2010. Phosphorylation of the  
893 *Mycobacterium tuberculosis*  $\beta$ -ketoacyl-acyl carrier protein reductase  
894 MabA regulates mycolic acid biosynthesis. *J. Biol. Chem.* **284**. 12714-  
895 12725.
- 896 60. **Molle V, Gulten G, Vilchèze C, Veyron-Churlet R, Zanella-Cléon I,**  
897 **Sacchettini JC, Jacobs WR Jr., Kremer L.** 2010. Phosphorylation of  
898 InhA inhibits mycolic acid biosynthesis and growth of *Mycobacterium*  
899 *tuberculosis*. *Mol Microbiol* **78**:1591–1605.
- 900 61. **Vilchèze C, Hards K, Berney M, Cook GM, Hartman T.** 2014.  
901 Energetics of Respiration and Oxidative Phosphorylation in *Mycobacteria*.  
902 *Microbiology Spectrum* **2**.
- 903 62. **Hartmans S, De Bont J.** 1992. The genus *Mycobacterium*—Nonmedical  
904 In The Prokaryotes. 2nd ed. Springer-Verlag, New York, NY.
- 905 63. **Murphy KC, Papavinasasundaram K, Sasseti CM.** 2015.  
906 *Mycobacterial recombineering*. *Methods Mol Biol* **1285**:177–199.



- 907 64. **Schnappinger D, O'Brien KM, Ehrt S.** 2015. Construction of conditional  
908 knockdown mutants in mycobacteria. *Methods Mol Biol* **1285**:151–175.
- 909 65. **Pashley CA, Parish T.** 2003. Efficient switching of mycobacteriophage  
910 L5-based integrating plasmids in *Mycobacterium tuberculosis*. *FEMS*  
911 *Microbiology Letters* **229**:211–215.
- 912 66. **Ducret A, Quardokus EM, Brun YV.** 2016. MicrobeJ, a tool for high  
913 throughput bacterial cell detection and quantitative analysis. *Nature*  
914 *Microbiology* **1**:671–677.
- 915 67. **Kieser KJ, Boutte CC, Kester JC, Baer CE, Barczak AK, Meniche X,**  
916 **Chao MC, Rego EH, Sasseti CM, Fortune SM, Rubin EJ.** 2015.  
917 Phosphorylation of the Peptidoglycan Synthase PonA1 Governs the Rate  
918 of Polar Elongation in *Mycobacteria*. *PLoS Pathog* **11**:e1005010.
- 919 68. **Gupta M, Sajid A, Arora G, Tandon V, Singh Y.** 2009. Forkhead-  
920 associated domain-containing protein Rv0019c and polyketide-associated  
921 protein PapA5, from substrates of serine/threonine protein kinase PknB to  
922 interacting proteins of *Mycobacterium tuberculosis*. *J Biol Chem*  
923 **284**:34723–34734.
- 924 69. **Cottin V, Van Linden A, Riches DW.** 1999. Phosphorylation of tumor  
925 necrosis factor receptor CD120a (p55) by p42(mapk/erk2) induces  
926 changes in its subcellular localization. *J Biol Chem* **274**:32975–32987.
- 927 70. **Su J, Forchhammer K.** 2013. Determinants for substrate specificity of  
928 the bacterial PP2C protein phosphatase tPphA from  
929 *Thermosynechococcus elongatus*. *FEBS J* **280**:694–707.
- 930 71. **Greenstein AE, Grundner C, Echols N, Gay LM, Lombana TN,**  
931 **Miecskowski CA, Pullen KE, Sung P-Y, Alber T.** 2005.  
932 Structure/Function Studies of Ser/Thr and Tyr Protein Phosphorylation in  
933 *Mycobacterium tuberculosis*. *J Mol Microbiol Biotechnol* **9**:167–181.
- 934 72. **Schlicker C, Fokina O, Kloft N, Grüne T, Becker S, Sheldrick GM,**  
935 **Forchhammer K.** 2008. Structural Analysis of the PP2C Phosphatase  
936 tPphA from *Thermosynechococcus elongatus*: A Flexible Flap  
937 Subdomain Controls Access to the Catalytic Site. *Journal of Molecular*  
938 *Biology* **376**:570–581.
- 939 73. **Wu M-L, Chan CL, Dick T.** 2016. Rel Is Required for Morphogenesis of  
940 Resting Cells in *Mycobacterium smegmatis*. *Front Microbiol* **7**:1100–10.
- 941 74. **Kuru E, Hughes HV, Brown PJ, Hall E, Tekkam S, Cava F, de Pedro**  
942 **MA, Brun YV, VanNieuwenhze MS.** 2012. In Situ Probing of Newly  
943 Synthesized Peptidoglycan in Live Bacteria with Fluorescent D-Amino  
944 Acids. *Angew Chem Int Ed* **51**:12519–12523.

- 945 75. **Kamariza M, Shieh P, Ealand CS, Peters JS, Chu B, Rodriguez-**  
946 **Rivera FP, Babu Sait MR, Treuren WV, Martinson N, Kalscheuer R,**  
947 **Kana BD, Bertozzi CR.** 2018. Rapid detection of Mycobacterium  
948 tuberculosis in sputum with a solvatochromic trehalose probe. *Sci Transl*  
949 *Med* **10**:eaam6310.
- 950 76. **Baranowski C, Welsh MA, Sham L-T, Eskandarian HA, Lim HC,**  
951 **Kieser KJ, Wagner JC, McKinney JD, Fantner GE, Ioerger TR, Walker**  
952 **S, Bernhardt TG, Rubin EJ, Rego EH.** 2018. Maturing Mycobacterium  
953 smegmatis peptidoglycan requires non-canonical crosslinks to maintain  
954 shape. *eLife* **7**:100.
- 955 77. **García-Heredia A, Pohane AA, Melzer ES, Carr CR, Fiolek TJ,**  
956 **Rundell SR, Lim HC, Wagner JC, Morita YS, Swarts BM, Siegrist MS.**  
957 2018. Peptidoglycan precursor synthesis along the sidewall of pole-  
958 growing mycobacteria. *eLife* **7**.
- 959 78. **Deb C, Lee C-M, Dubey VS, Daniel J, Abomoelak B, Sirakova TD,**  
960 **Pawar S, Rogers L, Kolattukudy PE.** 2009. A Novel In Vitro Multiple-  
961 Stress Dormancy Model for Mycobacterium tuberculosis Generates a  
962 Lipid-Loaded, Drug-Tolerant, Dormant Pathogen. *PLoS ONE* **4**:e6077.
- 963 79. **Zhang Y.** 2004. Persistent and dormant tubercle bacilli and latent  
964 tuberculosis. *Front Biosci* **9**:1136–1156.
- 965 80. **Wayne LG, Hayes LG.** 1996. An In Vitro Model for Sequential Study of  
966 Shiftdown of. *Infection and immunity* **64**:2062–2069.
- 967 81. **Cordillot M, Dubee V, Triboulet S, Dubost L, Marie A, Hugonnet JE,**  
968 **Arthur M, Mainardi JL.** 2013. In Vitro Cross-Linking of Mycobacterium  
969 tuberculosis Peptidoglycan by L,D-Transpeptidases and Inactivation of  
970 These Enzymes by Carbapenems. *Antimicrobial Agents and*  
971 *Chemotherapy* **57**:5940–5945.
- 972 82. **Liechti GW, Kuru E, Hall E, Kalinda A, Brun YV, VanNieuwenhze M,**  
973 **Maurelli AT.** 2014. A new metabolic cell-wall labelling method reveals  
974 peptidoglycan in Chlamydia trachomatis. *Nature* **506**:507–510.
- 975 83. **Feng Z, Barletta RG.** 2003. Roles of Mycobacterium smegmatis D-  
976 alanine:D-alanine ligase and D-alanine racemase in the mechanisms of  
977 action of and resistance to the peptidoglycan inhibitor D-cycloserine.  
978 *Antimicrobial Agents and Chemotherapy* **47**:283–291.
- 979 84. **Marrakchi H, Lanéelle G, Quémard AK.** 2000. InhA, a target of the  
980 antituberculous drug isoniazid, is involved in a mycobacterial fatty acid  
981 elongation system, FAS-II. *Microbiology (Reading, Engl)* **146 ( Pt 2)**:289–  
982 296.

- 983 85. **Brogden RN, Carmine AA, Heel RC, Speight TM, Avery GS.** 1982.  
984 Trimethoprim: a review of its antibacterial activity, pharmacokinetics and  
985 therapeutic use in urinary tract infections. *Drugs* **23**:405–430.
- 986 86. **Hancock RE, Bell A.** 1988. Antibiotic uptake into gram-negative bacteria.  
987 *Eur J Clin Microbiol Infect Dis* **7**:713–720.
- 988 87. **Neuhaus FC, Hammes WP.** 1981. Inhibition of cell wall biosynthesis by  
989 analogues and alanine. *Pharmacol Ther* **14**:265–319.
- 990 88. **Stephan J, Mailaender C, Etienne G, Daffé M, Niederweis M.** 2004.  
991 Multidrug resistance of a porin deletion mutant of *Mycobacterium*  
992 *smegmatis*. *Antimicrobial Agents and Chemotherapy* **48**:4163–4170.
- 993 89. **Ortega C, Liao R, Anderson LN, Rustad T, Ollodart AR, Wright AT,**  
994 **Sherman DR, Grundner C.** 2014. *Mycobacterium tuberculosis* Ser/Thr  
995 Protein Kinase B Mediates an Oxygen-Dependent Replication Switch.  
996 *Plos Biol* **12**:e1001746–11.
- 997 90. **Arora D, Chawla Y, Malakar B, Singh A, Nandicoori VK.** 2018. The  
998 transpeptidase PbpA and noncanonical transglycosylase RodA of  
999 *Mycobacterium tuberculosis* play important roles in regulating bacterial  
1000 cell lengths. *J Biol Chem* **293**:6497–6516.
- 1001 91. **Kaur P, Rausch M, Malakar B, Watson U, Damle NP, Chawla Y,**  
1002 **Srinivasan S, Sharma K, Schneider T, Jhingan GD, Saini D, Mohanty**  
1003 **D, Grein F, Nandicoori VK.** 2019. LipidII interaction with specific  
1004 residues of *Mycobacterium tuberculosis* PknB extracytoplasmic domain  
1005 governs its optimal activation. *Nature Communications* **10**:7470–17.
- 1006 92. **Le N-H, Locard-Paulet M, Stella A, Tomas N, Molle V, Burlet-Schiltz**  
1007 **O, Daffé M, Marrakchi H.** 2020. The protein kinase PknB negatively  
1008 regulates biosynthesis and trafficking of mycolic acids in mycobacteria. *J*  
1009 *Lipid Res* **61**:1180–1191.
- 1010 93. **Veyron-Churlet R, Molle V, Taylor RC, Brown AK, Besra GS, Zanella-**  
1011 **Cléon I, Fütterer K, Kremer L.** 2009. The *Mycobacterium tuberculosis*  
1012 beta-ketoacyl-acyl carrier protein synthase III activity is inhibited by  
1013 phosphorylation on a single threonine residue. *J Biol Chem* **284**:6414–  
1014 6424.
- 1015 94. **Li K-K, Qu D-H, Zhang H-N, Chen F-Y, Xu L, Wang M-Y, Su H-Y, Tao**  
1016 **S-C, Wu F-L.** 2020. Global discovery the PstP interactions using *Mtb*  
1017 proteome microarray and revealing novel connections with EthR. *J*  
1018 *Proteomics* **215**:103650.
- 1019 95. **Bollen M, Peti W, Ragusa MJ, Beullens M.** 2010. The extended PP1  
1020 toolkit: designed to create specificity. *Trends Biochem Sci* **35**:450–458.



- 1021 96. **Roy J, Cyert MS.** 2009. Cracking the phosphatase code: docking  
1022 interactions determine substrate specificity. *Science Signaling* **2**:re9–re9.
- 1023 97. **Lin K, Hwang PK, Fletterick RJ.** 1997. Distinct phosphorylation signals  
1024 converge at the catalytic center in glycogen phosphorylases. *Structure*  
1025 **5**:1511–1523.
- 1026 98. **García-Heredia A, Pohane AA, Melzer ES, Carr CR, Fiolek TJ,**  
1027 **Rundell SR, Lim HC, Wagner JC, Morita YS, Swarts BM, Siegrist MS.**  
1028 2018. Peptidoglycan precursor synthesis along the sidewall of pole-  
1029 growing mycobacteria. *eLife* **7**.
- 1030 99. **Harth G, Lee BY, Wang J, Clemens DL, Horwitz MA.** 1996. Novel  
1031 insights into the genetics, biochemistry, and immunocytochemistry of the  
1032 30-kilodalton major extracellular protein of *Mycobacterium tuberculosis*.  
1033 *Infection and immunity* **64**:3038–3047.
- 1034 100. **Viljoen A, Viela F, Kremer L, ne YFDX.** 2020. Fast chemical force  
1035 microscopy demonstrates that glycopeptidolipids define nanodomains of  
1036 varying hydrophobicity on mycobacteria. *Nanoscale Horizons* **5**:944–953.
- 1037 101. **Xu Z, Meshcheryakov VA, Poce G, Chng S-S.** 2017. MmpL3 is the  
1038 flippase for mycolic acids in mycobacteria. *Proceedings of the National*  
1039 *Academy of Sciences* **114**:7993–7998.
- 1040 102. **Mailaender C, Reiling N, Engelhardt H, Bossmann S, Ehlers S,**  
1041 **Niederweis M.** 2004. The MspA porin promotes growth and increases  
1042 antibiotic susceptibility of both *Mycobacterium bovis* BCG and  
1043 *Mycobacterium tuberculosis*. *Microbiology (Reading, Engl)* **150**:853–864.
- 1044 103. **Bhaskara GB, Wong MM, Verslues PE.** 2019. The flip side of  
1045 phospho□ signalling: Regulation of protein dephosphorylation and the  
1046 protein phosphatase 2Cs. *Plant Cell Environ* **42**:2913–2930.

1047

1048

1049

1050

1051

1052

1053

1054

1055 Figure S1

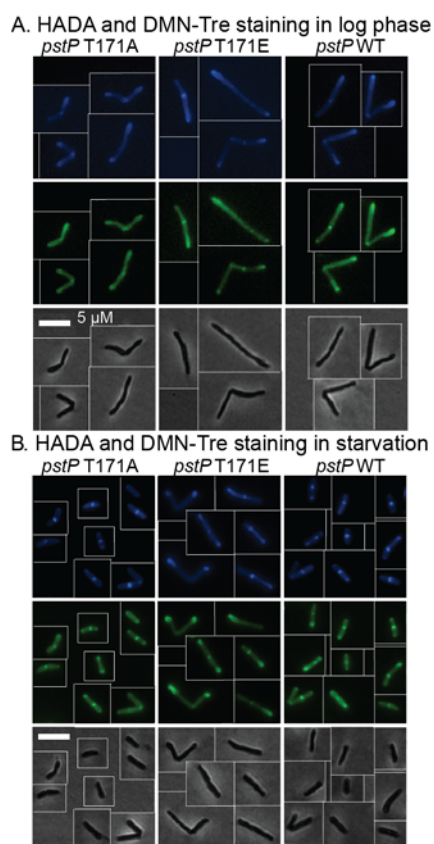

1056  
1057 (A) and (B) Representative micrographs of log. phase cells (A) and starved cells in HdB  
1058 with no glycerol (B) from *pstP* allele strains (WT, T17A and T171E) stained with the  
1059 fluorescent dyes HADA (blue) and DMN-Tre (green). Corresponding phase images are  
1060 shown on the bottom panel. The scale bar applies to all images.

1061 Figure S2

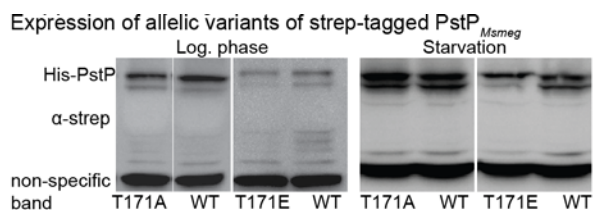

1062  
1063  
1064 Figure S2: α-strep Western blots of allelic variants of strep-tagged PstP<sub>Msmeg</sub> in log. (left  
1065 panel) and starvation phase (right panel). A non-specific band at the bottom in all strains  
1066 was seen in the blots.
